# Supplementary material for: Distribution Patterns of Benthic Protist Communities Depending on Depth Revealed by Environmental Sequencing—From the Sublittoral to the Deep Sea
Source: MDPI journal article supplement (doi:10.3390/microorganisms11071664), 2023-06-26
Supplement: s1 [file s1]

**Supplementary Figures and Tables to**

**Distribution Patterns of Benthic Protist Communities Depending on**

**Depth Revealed by Environmental Sequencing—From the Sublittoral**

**to the Deep Sea**

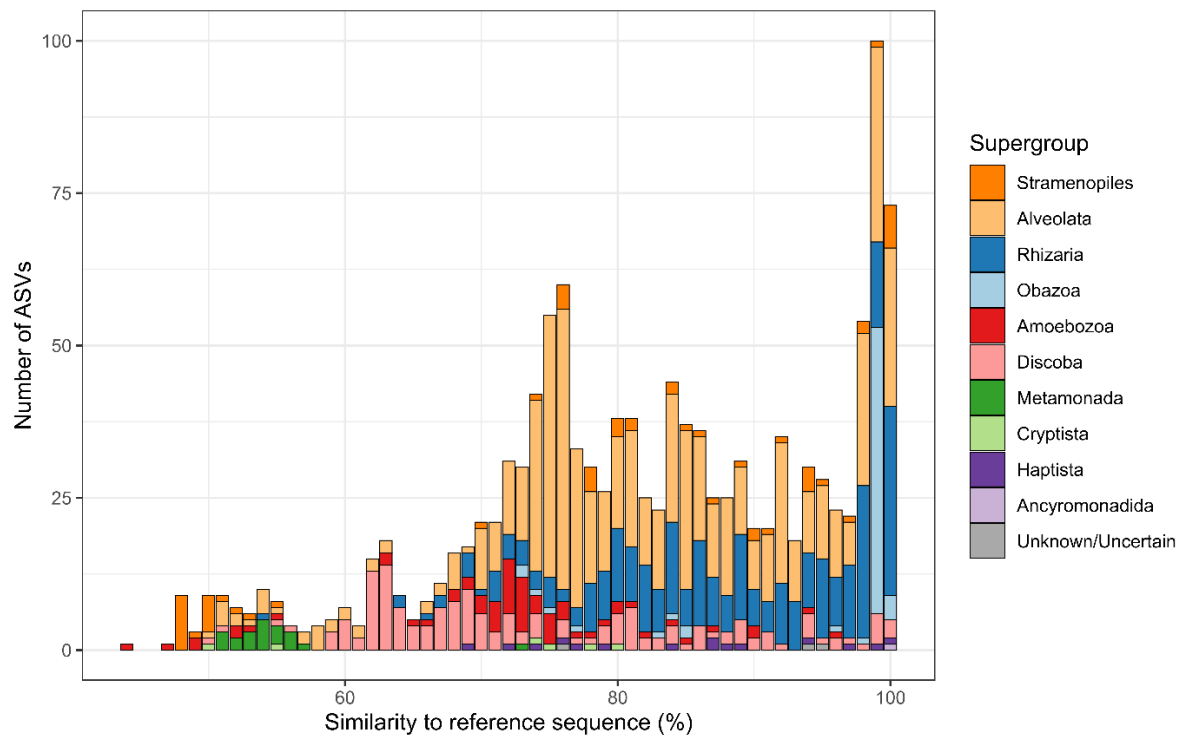

**Figure S1.** Relative sequence similarity of ASVs to sequences from the reference database. ASVs were assigned to major taxonomic groups.

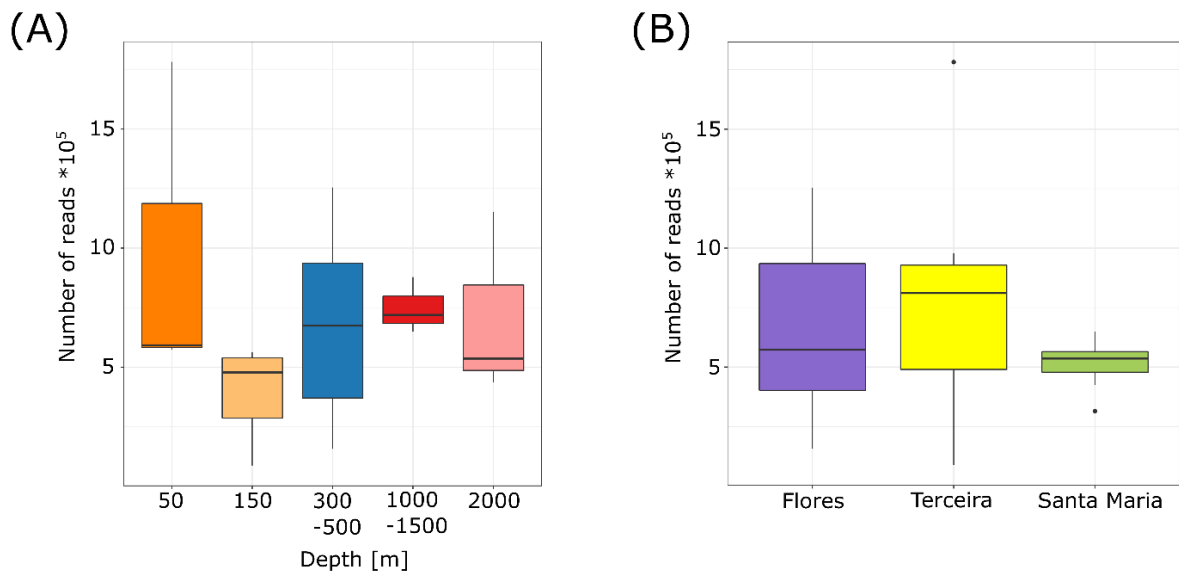

**Figure S2.** Number of reads at the different investigated (A) depths and (B) islands.

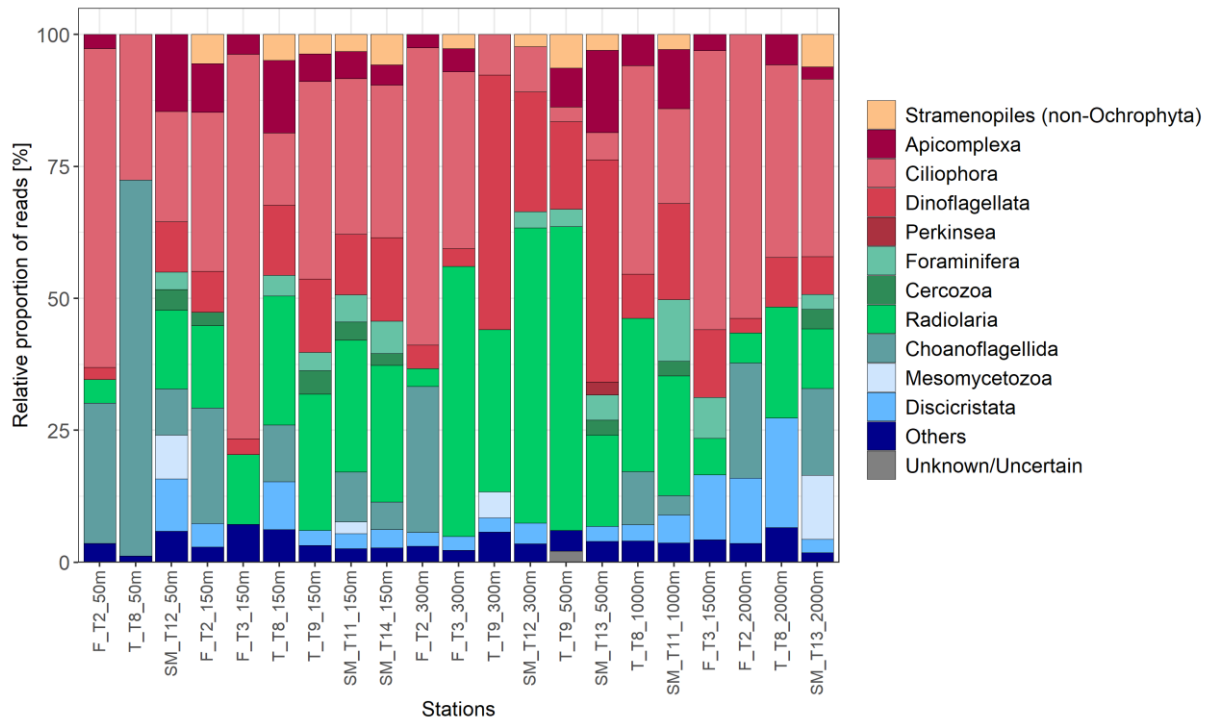

**Figure S3.** Relative proportion of reads assigned to major taxonomic groups (corresponding to division level in the PR<sup>2</sup> database) within all 21 stations. Taxonomic groups with relative proportions of <2% of the total ASVs are cumulated as “Others”.

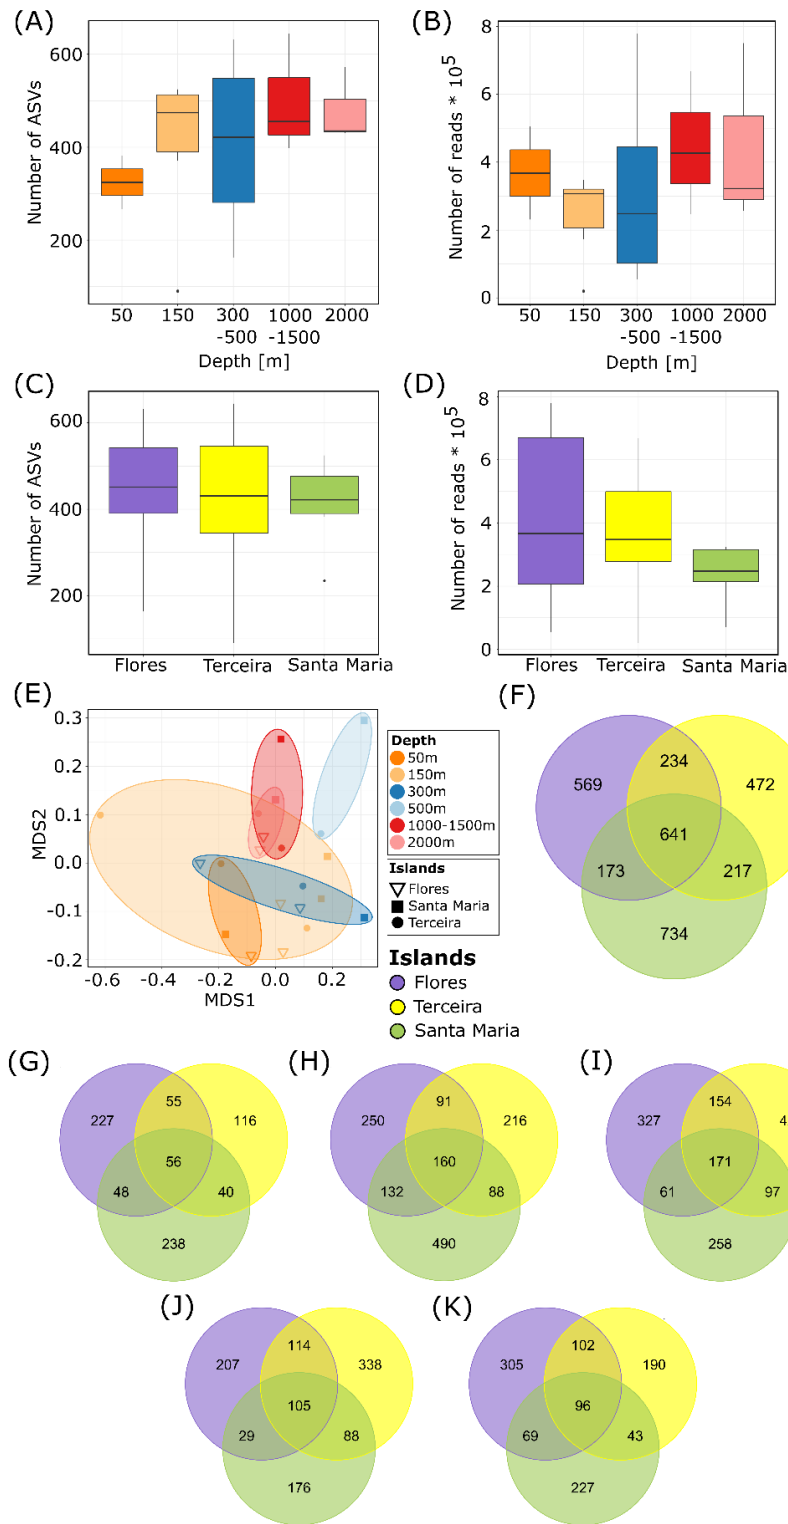

**Figure S4.** Analysis of low abundant ASVs which are filtered out by the read threshold chosen with the mock community (see Material and methods). Number of ASVs and reads at different investigated (A, B) depths and (C, D) islands. (E) NMDS plot based on the Jaccard distance comparing protist communities of the different investigated depths in the low abundant ASVs dataset (Stress:0.15). Venn diagrams showing unique and shared ASVs between different investigated islands for all investigated depths (F), only for 50m depth (G), 150m depth (H), 300-500m (I), 1000-1500m (J), 2000m (K).

**Table S1.** Sampled stations. Shown are gear numbers, name of the island around which the sample was taken, transect number, depth category, coordinates of sampling point, the exact depth at sampling and the gear type (SG = Shipek grab, MUC = Multicorer, BC = Boxcorer).

| <b>Gear<br/>nr.</b> | <b>Island</b> | <b>Transect</b> | <b>Depth<br/>Category<br/>[m]</b> | <b>Longitude</b> | <b>Latitude</b> | <b>Depth<br/>[m]</b> | <b>Gear<br/>Type</b> |
|---------------------|---------------|-----------------|-----------------------------------|------------------|-----------------|----------------------|----------------------|
| #59                 | Flores        | T2              | 50                                | 31° 08,367' W    | 39° 24,574' N   | 57                   | SG                   |
| #62                 | Flores        | T2              | 150                               | 31° 07,303' W    | 39° 24,347' N   | 119                  | SG                   |
| #45                 | Flores        | T2              | 300                               | 31° 06,833' W    | 39° 24,251' N   | 323                  | SG                   |
| #74                 | Flores        | T2              | 2000                              | 30° 36,731' W    | 39° 23,321' N   | 2076                 | MUC                  |
| #106                | Flores        | T3              | 150                               | 31° 16,054' W    | 39° 20,071' N   | 153                  | SG                   |
| #85                 | Flores        | T3              | 300                               | 31° 16,388' W    | 39° 19,700' N   | 257                  | SG                   |
| #93                 | Flores        | T3              | 1500                              | 31° 18,512' W    | 39° 15,906' N   | 1518                 | BC                   |
| #242                | Terceira      | T8              | 50                                | 27° 19,294' W    | 38° 48,153' N   | 48                   | SG                   |
| #253                | Terceira      | T8              | 150                               | 27° 20,092' W    | 38° 48,646' N   | 151                  | SG                   |
| #273                | Terceira      | T8              | 1000                              | 27° 25,071' W    | 38° 51,588' N   | 992                  | BC                   |
| #279                | Terceira      | T8              | 2000                              | 27° 31,342' W    | 38° 55,294' N   | 2019                 | MUC                  |
| #300                | Terceira      | T9              | 150                               | 27° 04,256' W    | 38° 48,134' N   | 153                  | SG                   |
| #288                | Terceira      | T9              | 300                               | 27° 03,526' W    | 38° 48,146' N   | 281                  | SG                   |
| #310                | Terceira      | T9              | 500                               | 27° 03,066' W    | 38° 48,350' N   | 482                  | SG                   |
| #343                | Santa Maria   | T11             | 150                               | 25° 03,411' W    | 37° 02,810' N   | 153                  | SG                   |
| #351                | Santa Maria   | T11             | 1000                              | 25° 00,610' W    | 37° 05,199' N   | 1338                 | MUC                  |
| #371                | Santa Maria   | T12             | 50                                | 25° 01,313' W    | 36° 55,045' N   | 50                   | SG                   |
| #362                | Santa Maria   | T12             | 300                               | 25° 01,359' W    | 36° 54,077' N   | 321                  | SG                   |
| #420                | Santa Maria   | T13             | 500                               | 25° 05,259' W    | 36° 55,171' N   | 505                  | BC                   |
| #430                | Santa Maria   | T13             | 2000                              | 25° 10,202' W    | 36° 51,064' N   | 2005                 | BC                   |
| #454                | Santa Maria   | T14             | 150                               | 25° 09,264' W    | 37° 03,298' N   | 153                  | SG                   |

**Table S2.** Mock community. Strains of the HFCC culture collection used as mock communities.

| HFCC No. | GenBank<br>Accession<br>Number | Species                     | Supergroup     |
|----------|--------------------------------|-----------------------------|----------------|
| 203      | MN315604                       | <i>Cafeteria burkhardae</i> | Stramenopila   |
| 176      | MT355122                       | <i>Massisteria</i> sp.      | Rhizaria       |
| 178      | MT355150                       | <i>Ministeria vibrans</i>   | Obazoa         |
| 171      | MT355133                       | Rynchomonadidae sp.         | Discoba        |
| 828      | MT355124                       | <i>Neobodo</i> sp.          | Discoba        |
| 744      | MT081566                       | <i>Aristerostoma</i> sp.    | Alveolata      |
| 175      | MT355148                       | <i>Fabomonas tropica</i>    | Ancyromonadida |
| 766      | MT355146                       | <i>Protocruzia</i> sp.      | Alveolata      |
| 768      | MT355117                       | Bicosoecida sp.             | Stramenopila   |
